# Supplementary material for: Optimized crystal orientation for enhanced reaction kinetics and reversibility of SnSe/NC hollow nanospheres towards high-rate and long-term lithium/sodium storage
Source: Royal Society of Chemistry journal article supplement (doi:10.1039/d3dt02237d), 2023-01-01
Supplement: d3dt02237d1.pdf [file d3dt02237d1.pdf]

## Support Information

# **Optimized crystal orientation for enhanced reaction kinetics and reversibility of SnSe/NC hollow nanospheres towards high-rate and long-cyclic lithium/sodium storage**

Huihui Song<sup>1,#</sup>, Qiang Zhou<sup>1,#</sup>, Zhicheng Song<sup>1</sup>, Kun Tian<sup>1</sup>, Chaohui Guan<sup>1</sup>,  
Zhengyuan Fang<sup>1</sup>, Gengyang Yuan<sup>1</sup>, Mi Lu<sup>1</sup>, Dong Wei<sup>2</sup>, Xiaodan Li<sup>1,\*</sup>

1 Fujian Provincial Key Laboratory of Functional Materials and Applications, School of Materials Science and Engineering, Xiamen University of Technology, Xiamen 361024, China.

2 College of Physics and Energy, Fujian Normal University, Fuzhou, 350117, China.

#:these authors contribute equally

\*E-mail: [xiaodan\\_li@yeah.net](mailto:xiaodan_li@yeah.net)

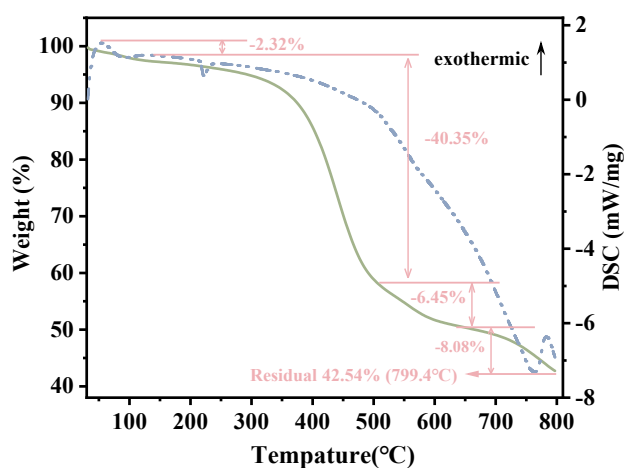

Fig. S1. The DSC curve of SnSe/NC.

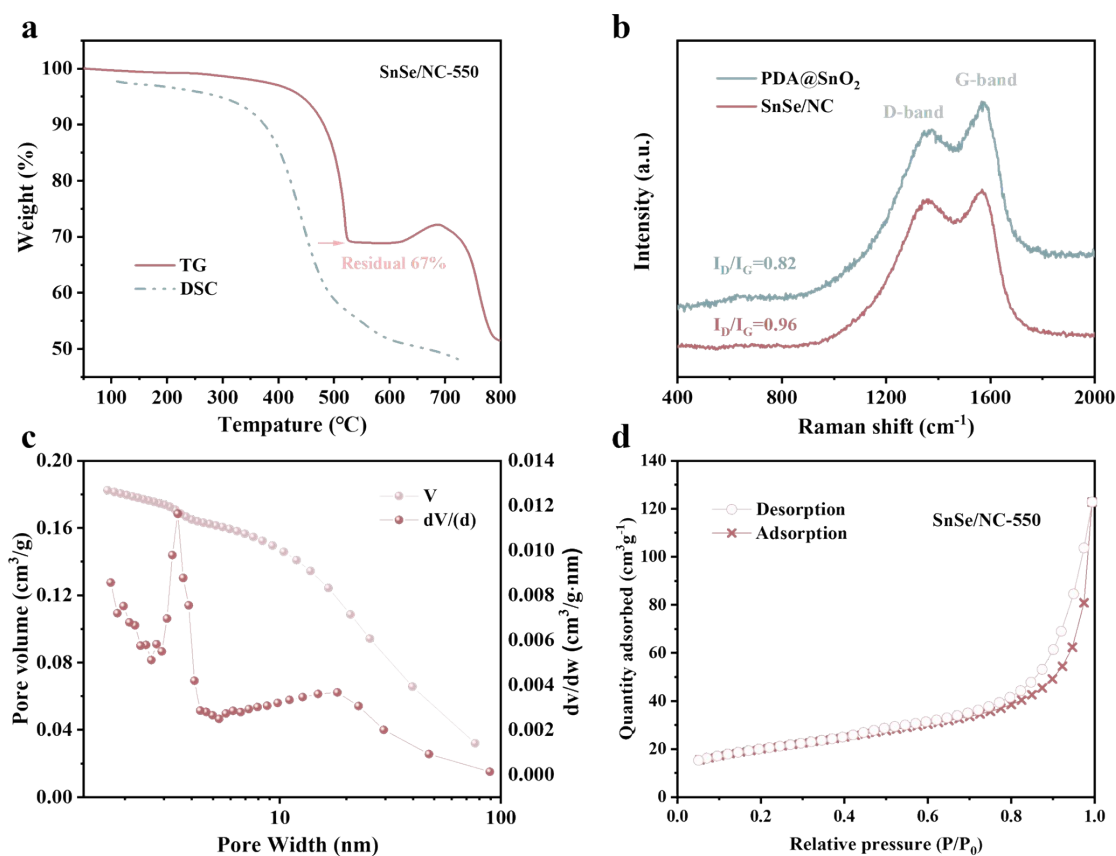

Fig. S2. Structural characterization of SnSe/NC. (a) Thermogravimetric analysis TGA curve. (b) Raman spectrum. (c, d) Nitrogen adsorption-desorption isotherms and the corresponding pore size distribution.

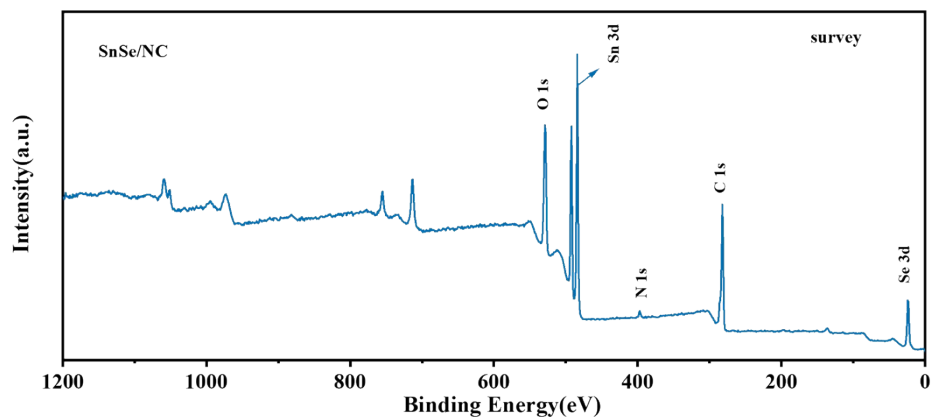

**Fig. S3.** XPS full spectrum of SnSe/NC hollow nanospheres.

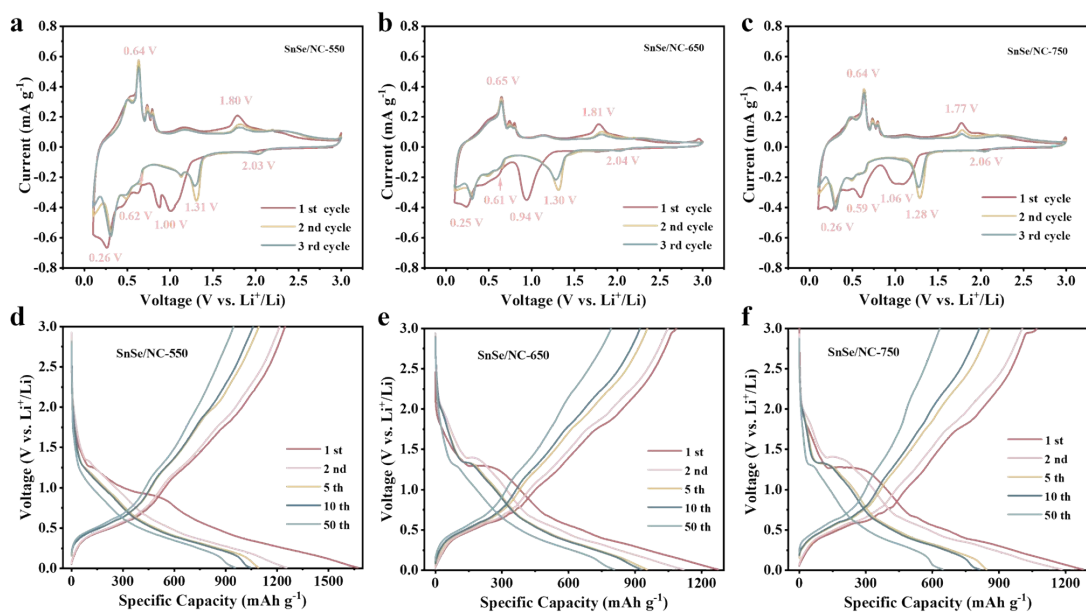

**Fig. S4.** (a-c) CV curves for the first three turns of CV at  $0.1 \text{ mV s}^{-1}$  scanning rate for SnSe/NC-550, SnSe/NC-650 and SnSe/NC-750. (d-f) GCD curves of three crystal surface characteristics at a current density of  $300 \text{ mA g}^{-1}$ .

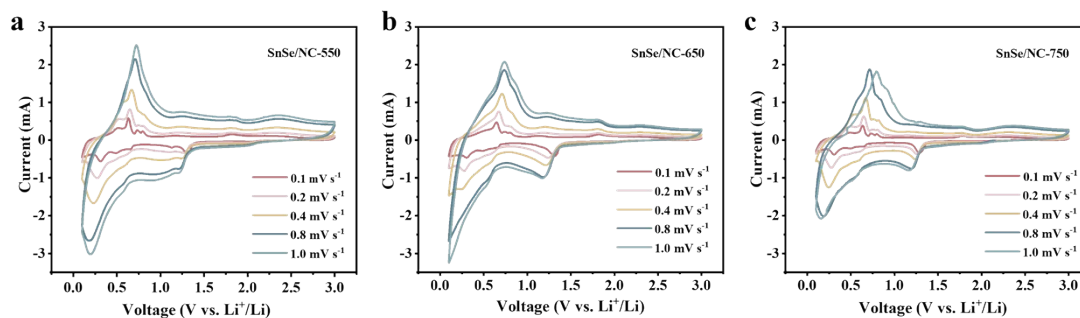

**Fig. S5.** (a-c) CV curves of SnSe/NC-550, SnSe/NC-650, and SnSe/NC-750.

**Table S1.** The fitted values of impedance for SnSe/NC-550, SnSe/NC-650 and SnSe/NC-750 before and after cycling.

| Sample      | Rs                        | Rf                        | Rct                       |
|-------------|---------------------------|---------------------------|---------------------------|
|             | before (after)<br>cycling | before (after)<br>cycling | before (after)<br>cycling |
| SnSe/NC-550 | 4.65 (13.12)              | 1.99 (60.84)              | 229.30 (9.25)             |
| SnSe/NC-650 | 3.60 (42.10)              | 63.66 (18.25)             | 76.47 (90.39)             |
| SnSe/NC-750 | 3.99 (21.95)              | 21.77 (14.56)             | 195.70 (45.39)            |

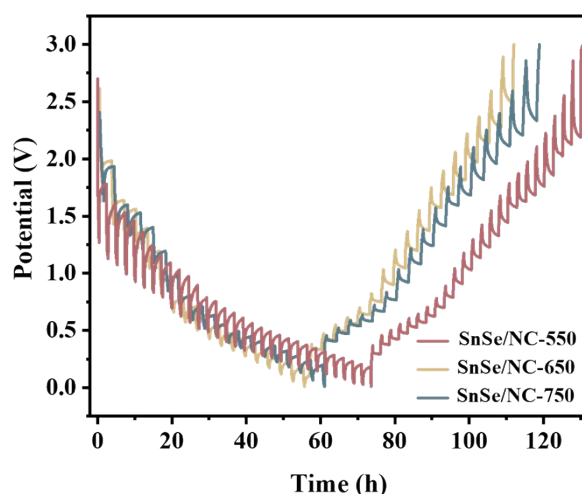

Fig. S6. GITT curves in the three electrodes at discharge/charge states.

GITT measurements: To activate the battery, five cycles at a current density of 300 mA g<sup>-1</sup> were conducted on the LANHE tester, ending with the the charge process. To obtain the discharge curves of GITT, repeated discharge-relaxation processes at a current density of 50 mA g<sup>-1</sup> were performed on the electrochemical station (CHI 660). The cut-off voltage is 0.01 V and all steps take 10 min. Similarly, the symmetrical charge curves were obtained by repeated charge-relaxation processes until a cut-off voltage of 3 V.

Calculation of  $D_{Li^+}$  is according to the following formula:

$$D = \frac{4}{\pi\tau} \left( \frac{n_m V_m}{S} \right)^2 \left( \frac{\Delta E_s}{\Delta E_t} \right)^2$$

Where  $D$  is the diffusion coefficient,  $\tau$  is relaxation time,  $n_m$  is mole number,  $V_m$  is the molar volume of active material,  $S$  is electrode area,  $\Delta E_s$  is the voltage change caused by an impulse,  $\Delta E_t$  is the voltage change of galvanostatic charge-discharge.

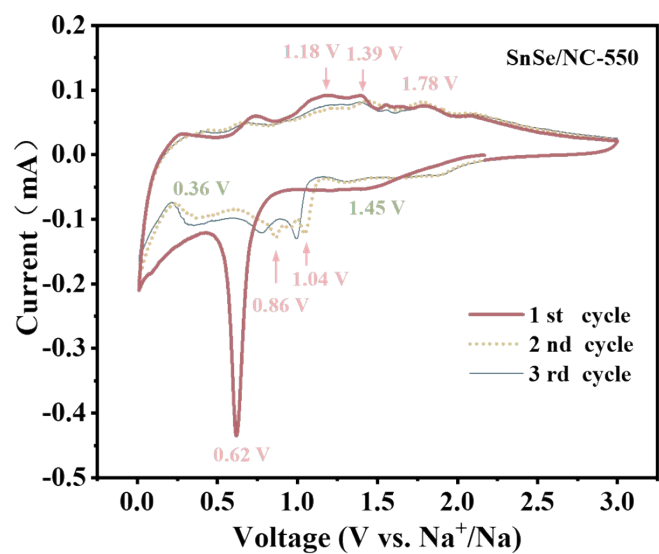

**Fig. S7.** The first three turns of the CV curve for SnSe/NC at a scan rate of 0.1 mV s<sup>-1</sup>.

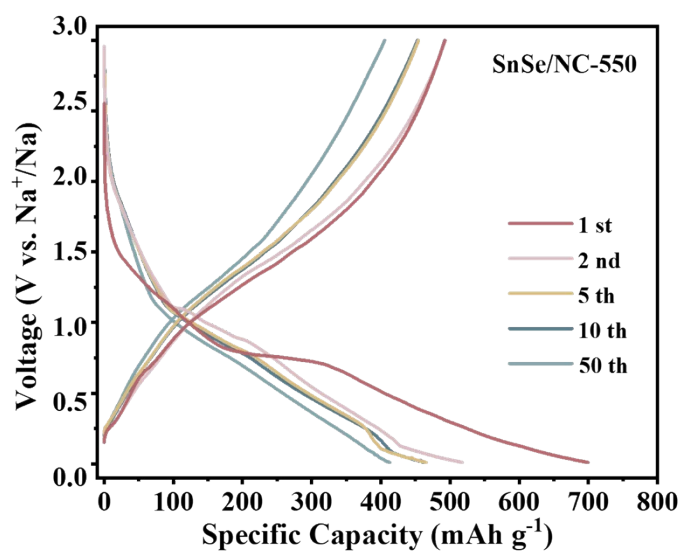

**Fig. S8.** The discharge/charge curves for the SnSe/NC-550 electrode at a current density of 100 mA g<sup>-1</sup>.

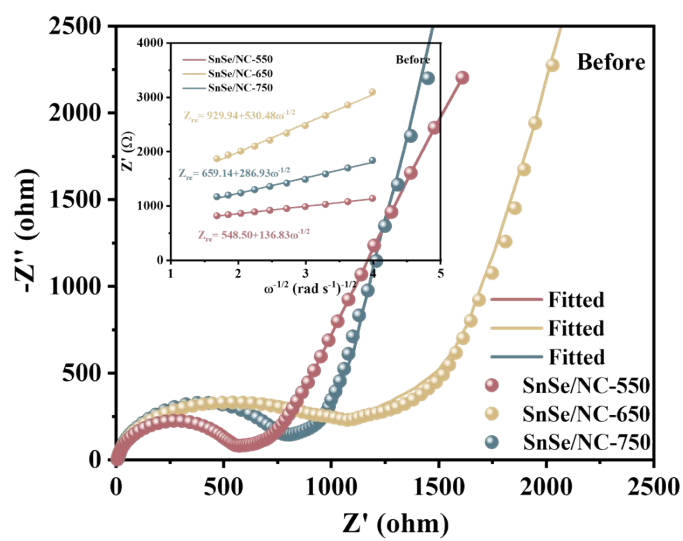

Fig. S9. EIS curves of SnSe/NC electrodes with three crystal features before cycling.

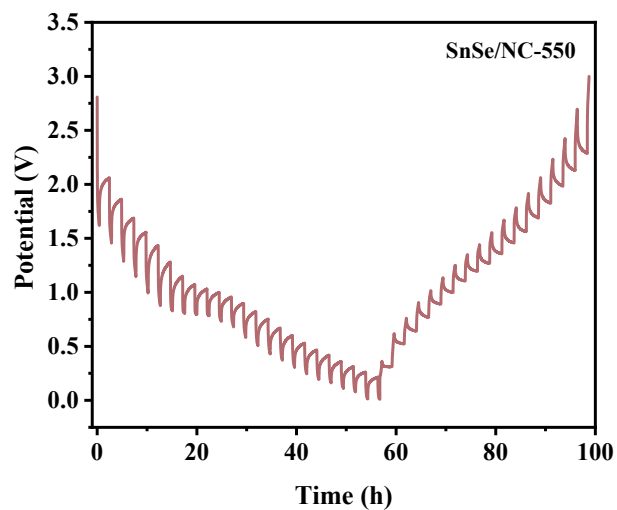

Fig. S10. GITT curves of sodium ions in the electrode at discharge/charge states.

**Table S2.** The fitted values of impedance for SnSe/NC-550, SnSe/NC-650 and SnSe/NC-750 before and after cycling

| Sample      | Rs                        | Rf                        | Rct                       |
|-------------|---------------------------|---------------------------|---------------------------|
|             | before (after)<br>cycling | before (after)<br>cycling | before (after)<br>cycling |
| SnSe/NC-550 | 5.27 (5.45)               | 512.50 (448.50)           | 146.40 (505.40)           |
| SnSe/NC-650 | 0.94 (8.38)               | 274.60 (454.00)           | 596.90 (776.00)           |
| SnSe/NC-750 | 4.90 (5.94)               | 651.20 (224.3)            | 28.49 (971.60)            |



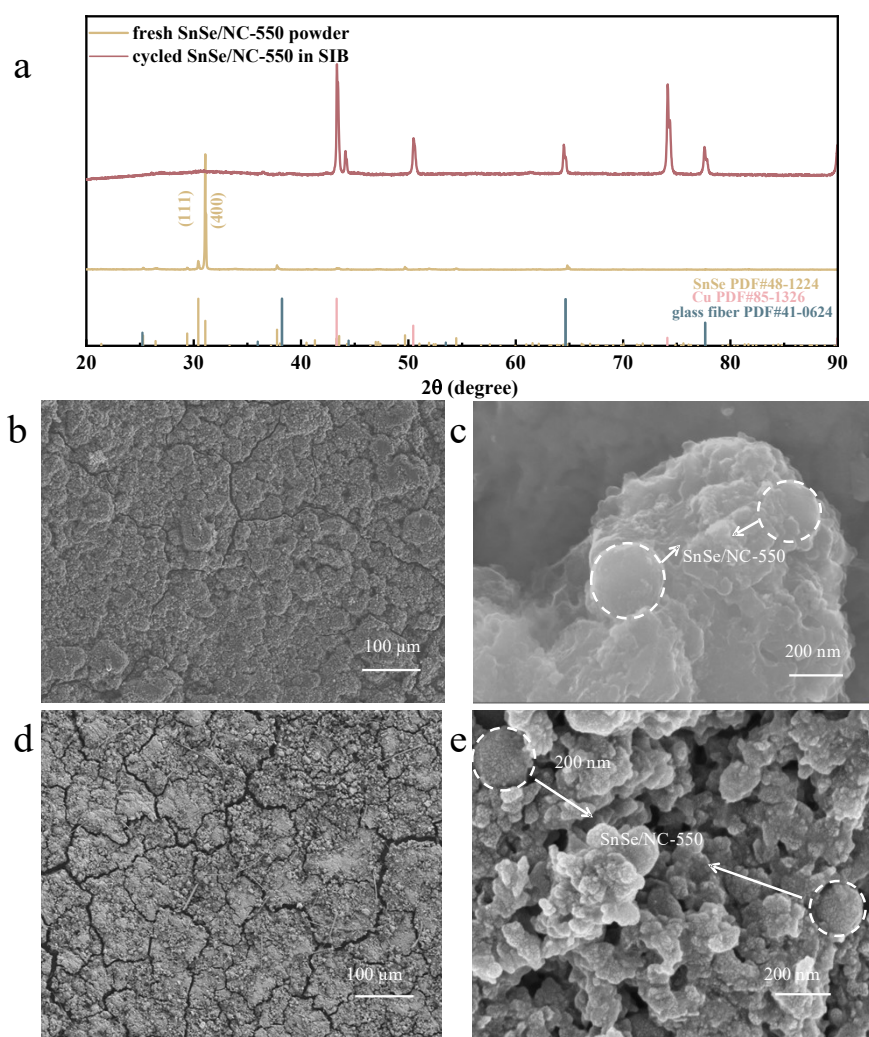

**Fig. S11.** Morphology and composition analysis of SnSe/NC-550 after 100 cycles. (a) XRD patterns. (b,c) SEM of electrode and powder in LIBs. (d,e) SEM of electrode and powder in SIBs
